# Supplementary material for: Incidence of non-communicable diseases (NCDs) in HIV patients on ART in a developing country: Case of Zimbabwe’s Chitungwiza Central Hospital—A retrospective cohort study (2010–2019)
Source: PLoS One. 2021 May 27;16(5):e0252180. doi: 10.1371/journal.pone.0252180 (PMC8158936; doi:10.1371/journal.pone.0252180)
Supplement: S1 Dataset — (XLS) [file pone.0252180.s001.xls]

## Sheet: ncd_data (1) Dataset for GEE
PID	Gender	Geographic_Location	Age	Age_group @ Baseline	Time	Cancer	CVD	Hypertension	Diabetes	CVD_Baseline	CVD_after_5years	CVD_after_10years	Diabetes@Baseline	Diabetes_after_5years	Diabetes_after_10years	Hypertension@baseline	Hypertension_after_5years	Hypertension_after_10years	Cancer@Baseline	Cancer_after_5years	Cancer_after_10years
1	Female	Urban	61	>55	0	0	0	0	0	No	No	No	No	No	No	No	Yes	Yes	No	No	No
1			66		1	0	0	1	0
1			71		2	0	0	1	0
2	Female	Urban	52	40-55	0	0	0	0	0	No	No	No	No	No	No	No	Yes	Yes	No	No	No
2			57		1	0	0	1	0
2			62		2	0	0	1	0
3	Female	Urban	41	40-55	0	0	0	0	0	No	No	No	No	No	No	No	Yes	Yes	No	No	No
3			46		1	0	0	1	0
3			51		2	0	0	1	0
4	Female	Urban	43	40-55	0	0	0	0	0	No	No	No	No	No	No	No	Yes	Yes	No	No	No
4			48		1	0	0	1	0
4			53		2	0	0	1	0
5	Female	Urban	46	40-55	0	0	0	0	0	No	No	No	No	No	No	No	Yes	Yes	No	No	No
5			51		1	0	0	1	0
5			56		2	0	0	1	0
6	Female	Urban	33	<40	0	0	0	0	0	No	No	No	No	No	No	No	No	No	No	No	No
6			38		1	0	0	0	0
6			43		2	0	0	0	0
7	Male	Urban	49	40-55	0	0	0	0	0	No	No	No	No	No	No	No	Yes	Yes	No	No	No
7			54		1	0	0	1	0
7			59		2	0	0	1	0
8	Female	Urban	64	>55	0	0	0	0	0	No	No	No	No	No	No	No	Yes	Yes	No	No	No
8			69		1	0	0	1	0
8			74		2	0	0	1	0
9	Female	Urban	62	>55	0	1	0	0	1	No	Yes	Yes	No	No	No	No	Yes	Yes	Yes	Yes	Yes
9			67		1	1	1	1	1
9			72		2	1	1	1	1
10	Female	Urban	59	>55	0	0	0	0	1	No	No	No	Yes	Yes	Yes	No	Yes	Yes	No	No	No
10			64		1	0	0	1	1
10			69		2	0	0	1	1
11	Male	Urban	51	40-55	0	0	0	0	0	No	No	No	No	Yes	Yes	No	No	No	No	No	No
11			56		1	0	0	0	1
11			61		2	0	0	0	1
12	Female	Urban	57	>55	0	0	0	1	0	No	No	No	No	No	No	Yes	Yes	Yes	No	No	No
12			62		1	0	0	1	0
12			67		2	0	0	1	0
13	Female	Urban	59	>55	0	0	0	0	0	No	No	Yes	No	No	No	No	Yes	Yes	No	No	No
13			64		1	0	0	1	0
13			69		2	0	1	1	0
14	Female	Urban	57	>55	0	0	0	0	0	No	No	No	No	Yes	Yes	No	Yes	Yes	No	No	No
14			62		1	0	0	1	1
14			67		2	0	0	1	1
15	Female	Urban	49	40-55	0	0	0	0	0	No	No	No	No	No	No	No	Yes	Yes	No	No	No
15			54		1	0	0	1	0
15			59		2	0	0	1	0
16	Female	Urban	62	>55	0	0	0	0	0	No	No	No	No	No	No	No	Yes	Yes	No	No	No
16			67		1	0	0	1	0
16			72		2	0	0	1	0
17	Female	Urban	44	40-55	0	0	0	0	0	No	No	No	No	No	No	No	Yes	Yes	No	No	No
17			49		1	0	0	1	0
17			54		2	0	0	1	0
18	Female	Urban	39	<40	0	0	0	0	0	No	No	No	No	No	No	No	Yes	Yes	No	No	No
18			44		1	0	0	1	0
18			49		2	0	0	1	0
19	Female	Urban	37	<40	0	0	0	0	0	No	No	No	No	No	No	No	Yes	Yes	No	No	No
19			42		1	0	0	1	0
19			47		2	0	0	1	0
20	Female	Urban	44	40-55	0	0	0	0	0	No	Yes	Yes	No	No	No	No	Yes	Yes	No	No	No
20			49		1	0	1	1	0
20			54		2	0	1	1	0
21	Female	Urban	52	40-55	0	0	0	0	0	No	No	No	No	No	No	No	Yes	Yes	No	No	No
21			57		1	0	0	1	0
21			62		2	0	0	1	0
22	Male	Peri-urban	65	>55	0	0	0	0	0	No	No	No	No	Yes	Yes	No	No	No	No	No	No
22			70		1	0	0	0	1
22			75		2	0	0	0	1
23	Female	Peri-urban	68	>55	0	0	0	0	0	No	No	No	No	Yes	Yes	No	Yes	Yes	No	No	No
23			73		1	0	0	1	1
23			78		2	0	0	1	1
24	Female	Peri-urban	57	>55	0	0	0	1	0	No	No	No	No	No	No	Yes	No	No	No	No	No
24			62		1	0	0	0	0
24			67		2	0	0	0	0
25	Female	Peri-urban	56	>55	0	0	0	0	0	No	No	No	No	No	No	No	No	No	No	Yes	Yes
25			61		1	1	0	0	0
25			66		2	1	0	0	0
26	Male	Peri-urban	42	40-55	0	0	0	0	0	No	No	No	No	No	No	No	No	No	No	No	No
26			47		1	0	0	0	0
26			52		2	0	0	0	0
27	Male	Peri-urban	51	40-55	0	0	0	0	0	No	No	No	No	No	Yes	No	No	No	No	No	No
27			56		1	0	0	0	0
27			61		2	0	0	0	1
28	Female	Urban	43	40-55	0	0	0	0	0	No	No	No	No	No	No	No	No	No	No	No	No
28			48		1	0	0	0	0
28			52		2	0	0	0	0
29	Male	Urban	52	40-55	0	0	0	0	0	No	No	No	No	No	No	No	No	No	No	No	No
29			57		1	0	0	0	0
29			62		2	0	0	0	0
30	Female	Peri-urban	44	40-55	0	0	0	0	0	No	No	No	No	No	No	No	No	No	No	No	No
30			49		1	0	0	0	0
30			54		2	0	0	0	0
31	Female	Urban	38	<40	0	0	0	0	0	No	No	No	No	No	No	No	No	No	No	No	No
31			43		1	0	0	0	0
31			48		2	0	0	0	0
32	Female	Rural	38	<40	0	0	0	0	0	No	No	Yes	No	No	No	No	No	No	No	No	No
32			43		1	0	0	0	0
32			48		2	0	1	0	0
33	Female	Peri-urban	70	>55	0	0	0	0	0	No	No	No	No	No	No	No	No	No	No	No	No
33			75		1	0	0	0	0
33			80		2	0	0	0	0
34	Female	Peri-urban	48	40-55	0	0	0	0	0	No	No	No	No	No	No	No	No	No	No	No	No
34			53		1	0	0	0	0
34			58		2	0	0	0	0
35	Female	Urban	31	<40	0	0	0	0	0	No	No	No	No	No	No	No	No	No	No	Yes	Yes
35			36		1	1	0	0	0
35			41		2	1	0	0	0
36	Female	Peri-urban	24	<40	0	0	0	0	0	No	No	No	No	No	No	No	No	No	No	No	No
36			29		1	0	0	0	0
36			34		2	0	0	0	0
37	Female	Peri-urban	48	40-55	0	0	0	0	0	No	No	No	No	No	No	No	No	No	No	Yes	Yes
37			53		1	1	0	0	0
37			58		2	1	0	0	0
38	Female	Peri-urban	52	40-55	0	0	0	0	0	No	No	No	No	No	No	No	No	No	No	Yes	Yes
38			57		1	1	0	0	0
38			62		2	1	0	0	0
39	Female	Peri-urban	65	>55	0	0	0	1	0	No	No	No	No	No	No	Yes	No	No	No	No	No
39			70		1	0	0	0	0
39			75		2	0	0	0	0
40	Female	Peri-urban	68	>55	0	0	0	0	1	No	No	No	Yes	Yes	Yes	No	No	No	No	No	No
40			73		1	0	0	0	1
40			78		2	0	0	0	1
41	Female	Rural	70	>55	0	0	0	0	0	No	No	No	No	No	No	No	No	No	No	No	No
41			75		1	0	0	0	0
41			80		2	0	0	0	0
42	Female	Urban	26	<40	0	0	0	0	0	No	No	No	No	No	No	No	No	No	No	No	No
42			31		1	0	0	0	0
42			36		2	0	0	0	0
43	Female	Peri-urban	63	>55	0	0	0	0	0	No	No	No	No	Yes	Yes	No	No	Yes	No	No	No
43			68		1	0	0	0	1
43			73		2	0	0	1	1
44	Female	Peri-urban	45	40-55	0	0	0	0	0	No	No	No	No	No	No	No	Yes	Yes	No	No	No
44			50		1	0	0	1	0
44			55		2	0	0	1	0
45	Female	Urban	60	>55	0	0	0	0	0	No	No	No	No	No	No	No	Yes	Yes	No	No	No
45			65		1	0	0	1	0
45			70		2	0	0	1	0
46	Female	Urban	41	40-55	0	0	0	0	0	No	No	No	No	No	No	No	No	No	No	No	No
46			46		1	0	0	0	0
46			51		2	0	0	0	0
47	Female	Peri-urban	66	>55	0	0	0	0	0	No	No	No	No	No	No	No	No	No	No	No	No
47			71		1	0	0	0	0
47			76		2	0	0	0	0
48	Male	Peri-urban	35	<40	0	0	0	1	0	No	No	No	No	No	No	Yes	No	No	No	No	No
48			40		1	0	0	0	0
48			45		2	0	0	0	0
49	Female	Peri-urban	41	40-55	0	0	0	0	0	No	No	No	No	No	No	No	Yes	Yes	No	No	No
49			46		1	0	0	1	0
49			51		2	0	0	1	0
50	Female	Peri-urban	21	<40	0	0	0	0	0	No	No	No	No	No	No	No	Yes	Yes	No	No	No
50			26		1	0	0	1	0
50			31		2	0	0	1	0
51	Female	Peri-urban	48	40-55	0	0	0	1	0	No	No	No	No	No	No	Yes	No	No	No	No	No
51			53		1	0	0	0	0
51			58		2	0	0	0	0
52	Female	Urban	19	<40	0	0	0	0	0	No	No	No	No	No	No	No	No	No	No	No	No
52			24		1	0	0	0	0
52			29		2	0	0	0	0
53	Female	Peri-urban	66	>55	0	0	0	0	0	No	No	No	No	No	No	No	No	No	No	No	No
53			71		1	0	0	0	0
53			76		2	0	0	0	0
54	Female	Peri-urban	58	>55	0	0	0	0	0	No	No	No	No	No	No	No	No	No	No	No	No
54			73		1	0	0	0	0
54			78		2	0	0	0	0
55	Female	Urban	26	<40	0	0	1	0	0	Yes	No	No	No	No	No	No	No	No	No	No	No
55			31		1	0	0	0	0
55			36		2	0	0	0	0
56	Female	Urban	67	>55	0	0	0	0	0	No	No	No	No	No	No	No	Yes	Yes	No	No	No
56			72		1	0	0	1	0
56			76		2	0	0	1	0
57	Male	Peri-urban	59	>55	0	0	0	0	0	No	No	No	No	No	No	No	No	No	No	No	No
57			64		1	0	0	0	0
57			69		2	0	0	0	0
58	Female	Peri-urban	41	40-55	0	0	0	0	0	No	No	No	No	No	No	No	Yes	Yes	No	No	No
58			46		1	0	0	1	0
58			51		2	0	0	1	0
59	Female	Peri-urban	26	<40	0	0	0	0	0	No	No	No	No	No	No	No	Yes	Yes	No	No	No
59			31		1	0	0	1	0
59			36		2	0	0	1	0
60	Male	Urban	77	>55	0	0	0	0	0	No	No	No	No	No	Yes	No	No	No	No	No	No
60			82		1	0	0	0	0
60			87		2	0	0	0	1
61	Female	Urban	65	>55	0	0	0	1	1	No	No	Yes	Yes	Yes	Yes	Yes	No	No	No	No	No
61			70		1	0	0	0	1
61			75		2	0	1	0	1
62	Female	Urban	29	<40	0	0	0	0	0	No	No	No	No	No	No	No	Yes	Yes	No	No	No
62			34		1	0	0	1	0
62			39		2	0	0	1	0
63	Female	Peri-urban	34	<40	0	0	0	0	0	No	No	No	No	No	No	No	Yes	Yes	No	No	No
63			39		1	0	0	1	0
63			44		2	0	0	1	0
64	Female	Rural	34	<40	0	0	0	0	0	No	No	No	No	No	No	No	Yes	Yes	No	No	No
64			39		1	0	0	1	0
64			44		2	0	0	1	0
65	Female	Peri-urban	24	<40	0	0	0	0	0	No	No	No	No	No	No	No	Yes	Yes	No	No	No
65			29		1	0	0	1	0
65			34		2	0	0	1	0
66	Female	Urban	37	<40	0	0	0	0	0	No	No	No	No	No	No	No	Yes	Yes	No	No	No
66			42		1	0	0	1	0
66			47		2	0	0	1	0
67	Male	Urban	45	40-55	0	0	0	0	0	No	No	No	No	Yes	Yes	No	No	No	No	Yes	Yes
67			50		1	1	0	0	1
67			55		2	1	0	0	1
68	Female	Urban	32	40-55	0	0	0	0	0	No	Yes	Yes	No	No	No	No	Yes	Yes	No	No	No
68			37		1	0	1	1	0
68			42		2	0	1	1	0
69	Female	Urban	39	<40	0	0	0	0	0	No	No	No	No	Yes	Yes	No	No	No	No	No	No
69			44		1	0	0	0	1
69			49		2	0	0	0	1
70	Female	Peri-urban	29	<40	0	0	0	0	0	No	No	No	No	No	No	No	No	No	No	No	No
70			34		1	0	0	0	0
70			39		2	0	0	0	0
71	Male	Urban	45	40-55	0	0	0	1	0	No	Yes	Yes	No	No	No	Yes	No	No	No	No	No
71			50		1	0	1	0	0
71			55		2	0	1	0	0
72	Male	Urban	55	40-55	0	0	0	0	1	No	No	No	Yes	No	No	No	No	No	No	No	No
72			60		1	0	0	0	0
72			65		2	0	0	0	0
73	Female	Peri-urban	33	<40	0	0	0	0	0	No	No	No	No	No	No	No	No	No	No	No	No
73			38		1	0	0	0	0
73			43		2	0	0	0	0
74	Male	Peri-urban	34	<40	0	0	0	0	0	No	No	No	No	No	No	No	No	No	No	No	No
74			39		1	0	0	0	0
74			44		2	0	0	0	0
75	Female	Peri-urban	50	40-55	0	0	0	0	0	No	No	No	No	No	Yes	No	No	No	No	No	No
75			55		1	0	0	0	0
75			60		2	0	0	0	1
76	Male	Peri-urban	40	40-55	0	0	0	0	0	No	No	No	No	No	No	No	No	No	No	No	No
76			45		1	0	0	0	0
76			50		2	0	0	0	0
77	Female	Peri-urban	24	<40	0	0	0	0	1	No	No	No	Yes	Yes	Yes	No	No	No	No	No	No
77			29		1	0	0	0	1
77			34		2	0	0	0	1
78	Male	Peri-urban	69	>55	0	0	0	1	0	No	No	No	No	No	No	Yes	No	No	No	No	No
78			74		1	0	0	0	0
78			79		2	0	0	0	0
79	Male	Peri-urban	56	>55	0	0	0	0	0	No	No	No	No	No	No	No	No	No	No	No	No
79			61		1	0	0	0	0
79			66		2	0	0	0	0
80	Female	Urban	40	40-55	0	0	0	0	1	No	No	No	Yes	Yes	Yes	No	No	No	No	No	No
80			45		1	0	0	0	1
80			50		2	0	0	0	1
81	Female	Urban	44	40-55	0	0	0	0	0	No	No	No	No	Yes	Yes	No	No	No	No	No	No
81			49		1	0	0	0	1
81			54		2	0	0	0	1
82	Female	Peri-urban	19	<40	0	0	0	0	0	No	No	No	No	No	No	No	Yes	Yes	No	No	No
82			24		1	0	0	1	0
82			29		2	0	0	1	0
83	Female	Urban	27	<40	0	0	0	0	0	No	No	No	No	No	No	No	Yes	Yes	No	No	No
83			32		1	0	0	1	0
83			37		2	0	0	1	0
84	Male	Urban	68	>55	0	0	0	0	0	No	No	No	No	No	No	No	No	No	No	No	No
84			73		1	0	0	0	0
84			78		2	0	0	0	0
85	Male	Rural	52	40-55	0	0	0	0	0	No	No	No	No	No	No	No	No	No	No	No	No
85			57		1	0	0	0	0
85			62		2	0	0	0	0
86	Male	Peri-urban	77	>55	0	0	0	0	0	No	No	No	No	Yes	Yes	No	No	No	No	No	No
86			82		1	0	0	0	1
86			87		2	0	0	0	1
87	Male	Peri-urban	63	>55	0	1	0	0	0	No	No	No	No	Yes	Yes	No	No	No	Yes	No	No
87			68		1	0	0	0	1
87			73		2	0	0	0	1
88	Male	Urban	68	>55	0	0	0	0	0	No	No	No	No	Yes	Yes	No	No	No	No	No	No
88			73		1	0	0	0	1
88			78		2	0	0	0	1
89	Male	Urban	32	<40	0	0	0	0	0	No	No	No	No	No	No	No	No	No	No	No	No
89			37		1	0	0	0	0
89			42		2	0	0	0	0
90	Male	Peri-urban	73	>55	0	0	0	1	0	No	No	No	No	No	No	Yes	No	No	No	No	No
90			78		1	0	0	0	0
90			83		2	0	0	0	0
91	Male	Peri-urban	23	<40	0	0	0	0	0	No	No	No	No	No	No	No	No	No	No	No	No
91			28		1	0	0	0	0
91			33		2	0	0	0	0
92	Male	Urban	70	>55	0	0	0	0	0	No	No	No	No	No	No	No	No	No	No	No	No
92			75		1	0	0	0	0
92			80		2	0	0	0	0
93	Male	Urban	54	40-55	0	0	0	0	0	No	No	No	No	No	No	No	No	No	No	No	No
93			59		1	0	0	0	0
93			64		2	0	0	0	0
94	Male	Peri-urban	39	<40	0	0	0	0	0	No	No	No	No	No	No	No	No	No	No	No	No
94			44		1	0	0	0	0
94			49		2	0	0	0	0
95	Male	Peri-urban	66	>55	0	0	0	0	0	No	No	No	No	No	No	No	No	No	No	No	No
95			71		1	0	0	0	0
95			76		2	0	0	0	0
96	Male	Urban	53	40-55	0	0	0	0	0	No	No	No	No	No	No	No	No	No	No	No	No
96			58		1	0	0	0	0
96			63		2	0	0	0	0
97	Male	Rural	73	>55	0	0	0	0	0	No	Yes	Yes	No	No	No	No	No	No	No	No	No
97			78		1	0	1	0	0
97			83		2	0	1	0	0
98	Male	Peri-urban	59	>55	0	0	0	0	0	No	No	No	No	No	No	No	No	No	No	No	No
98			64		1	0	0	0	0
98			69		2	0	0	0	0
99	Male	Urban	62	>55	0	0	1	0	0	Yes	No	No	No	No	No	No	No	No	No	No	No
99			67		1	0	0	0	0
99			72		2	0	0	0	0
100	Male	Peri-urban	64	>55	0	0	0	0	0	No	No	No	No	No	No	No	No	No	No	Yes	Yes
100			69		1	1	0	0	0
100			74		2	1	0	0	0
101	Male	Peri-urban	29	<40	0	0	1	0	0	Yes	No	No	No	No	No	No	No	No	No	No	No
101			34		1	0	0	0	0
101			39		2	0	0	0	0
102	Male	Peri-urban	43	40-55	0	0	0	0	0	No	Yes	Yes	No	No	No	No	No	No	No	No	No
102			48		1	0	1	0	0
102			52		2	0	1	0	0
103	Male	Peri-urban	28	<40	0	0	0	0	0	No	No	No	No	No	No	No	No	No	No	Yes	Yes
103			33		1	1	0	0	0
103			38		2	1	0	0	0
104	Male	Urban	69	>55	0	0	0	0	0	No	No	No	No	No	No	No	No	No	No	No	No
104			74		1	0	0	0	0
104			79		2	0	0	0	0
105	Male	Peri-urban	74	>55	0	0	0	0	0	No	No	No	No	No	No	No	No	No	No	No	No
105			79		1	0	0	0	0
105			84		2	0	0	0	0
106	Male	Peri-urban	19	<40	0	0	0	0	0	No	Yes	Yes	No	No	No	No	No	No	No	No	No
106			24		1	0	1	0	0
106			29		2	0	1	0	0
107	Male	Urban	66	>55	0	0	1	0	0	Yes	No	No	No	No	No	No	No	No	No	No	No
107			71		1	0	0	0	0
107			76		2	0	0	0	0
108	Male	Peri-urban	56	>55	0	0	0	0	0	No	No	No	No	No	No	No	No	Yes	No	No	No
108			61		1	0	0	0	0
108			66		2	0	0	1	0
109	Male	Urban	37	<40	0	0	0	0	0	No	No	No	No	No	No	No	No	No	No	No	No
109			42		1	0	0	0	0
109			47		2	0	0	0	0
110	Male	Peri-urban	53	40-55	0	0	0	0	0	No	No	No	No	No	No	No	No	No	No	No	No
110			58		1	0	0	0	0
110			63		2	0	0	0	0
111	Male	Peri-urban	56	>55	0	0	0	0	0	No	No	No	No	No	No	No	No	No	No	No	No
111			61		1	0	0	0	0
111			66		2	0	0	0	0
112	Male	Urban	71	>55	0	0	0	1	0	No	No	No	No	No	No	Yes	No	No	No	No	No
112			76		1	0	0	0	0
112			81		2	0	0	0	0
113	Male	Urban	67	>55	0	0	0	0	0	No	No	No	No	No	No	No	No	No	No	No	No
113			72		1	0	0	0	0
113			77		2	0	0	0	0
114	Female	Peri-urban	68	>55	0	0	0	1	0	No	No	No	No	Yes	Yes	Yes	No	No	No	No	No
114			73		1	0	0	0	1
114			78		2	0	0	0	1
115	Female	Peri-urban	37	40-55	0	0	0	0	1	No	No	No	Yes	No	No	No	No	No	No	No	No
115			42		1	0	0	0	0
115			47		2	0	0	0	0
116	Female	Peri-urban	74	>55	0	0	0	0	1	No	No	No	Yes	Yes	Yes	No	No	No	No	No	No
116			70		1	0	0	0	1
116			84		2	0	0	0	1
117	Female	Peri-urban	41	40-55	0	0	1	0	0	Yes	No	No	No	No	No	No	No	No	No	No	No
117			46		1	0	0	0	0
117			51		2	0	0	0	0
118	Female	Peri-urban	71	>55	0	0	0	0	1	No	No	No	Yes	No	No	No	No	No	No	No	No
118			76		1	0	0	0	0
118			81		2	0	0	0	0
119	Female	Rural	76	>55	0	0	1	0	0	Yes	Yes	Yes	No	No	No	No	No	No	No	No	No
119			81		1	0	1	0	0
119			86		2	0	1	0	0
120	Female	Peri-urban	79	>55	0	0	0	0	1	No	Yes	Yes	Yes	No	No	No	No	No	No	No	No
120			84		1	0	1	0	0
120			89		2	0	1	0	0
121	Female	Peri-urban	28	<40	0	0	0	0	0	No	No	No	No	Yes	Yes	No	No	No	No	No	No
121			33		1	0	0	0	1
121			38		2	0	0	0	1
122	Female	Urban	41	40-55	0	0	0	0	0	No	No	No	No	No	No	No	No	No	No	No	No
122			46		1	0	0	0	0
122			52		2	0	0	0	0
123	Female	Peri-urban	67	>55	0	0	0	0	0	No	No	No	No	No	No	No	No	No	No	No	No
123			72		1	0	0	0	0
123			77		2	0	0	0	0
124	Female	Peri-urban	67	>55	0	0	1	0	0	Yes	No	No	No	No	No	No	No	No	No	No	No
124			72		1	0	0	0	0
124			77		2	0	0	0	0
125	Female	Urban	54	40-55	0	0	0	0	0	No	No	No	No	No	No	No	No	No	No	No	No
125			59		1	0	0	0	0
125			64		2	0	0	0	0
126	Female	Peri-urban	64	>55	0	0	0	1	0	No	No	No	No	No	No	Yes	Yes	Yes	No	No	No
126			69		1	0	0	1	0
126			74		2	0	0	1	0
127	Female	Peri-urban	51	40-55	0	0	0	0	0	No	No	No	No	No	No	No	No	No	No	No	No
127			56		1	0	0	0	0
127			61		2	0	0	0	0
128	Female	Rural	31	<40	0	0	0	0	0	No	No	No	No	No	No	No	No	No	No	No	No
128			36		1	0	0	0	0
128			41		2	0	0	0	0
129	Female	Rural	66	>55	0	0	0	0	0	No	No	No	No	Yes	Yes	No	No	No	No	No	No
129			71		1	0	0	0	1
129			76		2	0	0	0	1
130	Female	Urban	40	40-55	0	0	0	0	0	No	No	No	No	No	No	No	No	No	No	No	No
130			45		1	0	0	0	0
130			50		2	0	0	0	0
131	Female	Rural	58	>55	0	0	0	1	0	No	No	No	No	No	No	Yes	No	No	No	No	No
131			63		1	0	0	0	0
131			68		2	0	0	0	0
132	Female	Peri-urban	31	<40	0	1	0	0	0	No	No	No	No	No	No	No	No	No	Yes	No	No
132			36		1	0	0	0	0
132			41		2	0	0	0	0
133	Female	Peri-urban	59	>55	0	0	0	0	0	No	No	Yes	No	No	Yes	No	No	Yes	No	No	No
133			64		1	0	0	0	0
133			69		2	0	1	1	1
134	Female	Peri-urban	77	>55	0	0	0	0	0	No	Yes	Yes	No	No	No	No	No	No	No	No	No
134			82		1	0	1	0	0
134			87		2	0	1	0	0
135	Female	Urban	48	40-55	0	0	0	0	0	No	No	No	No	No	No	No	No	No	No	Yes	Yes
135			53		1	1	0	0	0
135			58		2	1	0	0	0
136	Female	Urban	78	>55	0	0	0	0	0	No	No	No	No	No	No	No	No	No	No	No	No
136			83		1	0	0	0	0
136			88		2	0	0	0	0
137	Male	Urban	57	>55	0	0	0	0	0	No	No	No	No	Yes	Yes	No	Yes	Yes	No	No	No
137			62		1	0	0	1	1
137			67		2	0	0	1	1
138	Female	Urban	50	40-55	0	0	0	0	0	No	No	No	No	Yes	Yes	No	No	Yes	No	No	No
138			55		1	0	0	0	1
138			60		2	0	0	1	1
139	Male	Urban	59	>55	0	0	0	0	0	No	No	No	No	No	No	No	Yes	Yes	No	No	No
139			64		1	0	0	1	0
139			69		2	0	0	1	0
140	Male	Urban	51	40-55	0	0	0	0	0	No	Yes	Yes	No	No	No	No	Yes	Yes	No	No	No
140			56		1	0	1	1	0
140			61		2	0	1	1	0
141	Female	Urban	31	<40	0	0	0	0	0	No	No	No	No	No	No	No	No	No	No	No	No
141			36		1	0	0	0	0
141			41		2	0	0	0	0
142	Male	Urban	55	40-55	0	0	0	0	0	No	No	No	No	No	No	No	No	Yes	No	No	Yes
142			60		1	0	0	0	0
142			65		2	1	0	1	0
143	Male	Urban	62	>55	0	0	0	0	0	No	No	Yes	No	No	No	No	Yes	Yes	No	No	No
143			67		1	0	0	1	0
143			72		2	0	1	1	0
144	Male	Urban	42	40-55	0	0	0	0	0	No	No	No	No	No	No	No	Yes	Yes	No	No	No
144			47		1	0	0	1	0
144			52		2	0	0	1	0
145	Female	Urban	38	<40	0	0	0	0	0	No	No	No	No	Yes	Yes	No	No	No	No	No	No
145			43		1	0	0	0	1
145			48		2	0	0	0	1
146	Male	Urban	45	40-55	0	0	0	0	0	No	No	No	No	No	No	No	No	No	No	No	No
146			50		1	0	0	0	0
146			55		2	0	0	0	0
147	Female	Urban	63	>55	0	0	0	0	0	No	No	No	No	No	No	No	Yes	Yes	No	No	No
147			68		1	0	0	1	0
147			73		2	0	0	1	0
148	Male	Urban	54	40-55	0	0	0	0	0	No	No	No	No	Yes	Yes	No	No	No	No	No	No
148			59		1	0	0	0	1
148			64		2	0	0	0	1
149	Female	Urban	74	>55	0	0	0	1	0	No	No	No	No	Yes	Yes	Yes	Yes	Yes	No	No	No
149			79		1	0	0	1	1
149			84		2	0	0	1	1
150	Male	Urban	68	>55	0	0	0	0	0	No	No	No	No	No	Yes	No	No	Yes	No	No	No
150			73		1	0	0	0	0
150			78		2	0	0	1	1
151	Male	Urban	36	<40	0	0	0	0	0	No	No	No	No	No	No	No	No	No	No	No	No
151			41		1	0	0	0	0
151			46		2	0	0	0	0
152	Female	Urban	44	40-55	0	0	0	0	0	No	No	No	No	No	No	No	Yes	Yes	No	No	No
152			49		1	0	0	1	0
152			54		2	0	0	1	0
153	Male	Urban	55	40-55	0	0	0	0	0	No	No	No	No	Yes	Yes	No	No	No	No	No	No
153			60		1	0	0	0	1
153			65		2	0	0	0	1
154	Female	Urban	45	40-55	0	0	0	0	0	No	No	No	No	No	No	No	Yes	Yes	No	No	No
154			50		1	0	0	1	0
154			55		2	0	0	1	0
155	Female	Urban	51	40-55	0	0	0	0	0	No	No	No	No	Yes	Yes	No	Yes	Yes	No	No	No
155			56		1	0	0	1	1
155			61		2	0	0	1	1
156	Female	Urban	43	40-55	0	0	0	1	0	No	No	No	No	No	No	Yes	Yes	Yes	No	No	No
156			48		1	0	0	1	0
156			53		2	0	0	1	0
157	Male	Urban	61	>55	0	0	0	0	0	No	Yes	Yes	No	No	No	No	No	Yes	No	No	No
157			66		1	0	1	0	0
157			71		2	0	1	1	0
158	Female	Urban	36	<40	0	0	0	0	0	No	No	No	No	No	No	No	No	No	No	No	No
158			41		1	0	0	0	0
158			46		2	0	0	0	0
159	Female	Urban	48	40-55	0	0	0	0	0	No	No	No	No	Yes	Yes	No	Yes	Yes	No	No	No
159			53		1	0	0	1	1
159			58		2	0	0	1	1
160	Male	Urban	45	40-55	0	0	0	0	0	No	No	No	No	Yes	Yes	No	No	No	No	No	No
160			50		1	0	0	0	1
160			55		2	0	0	0	1
161	Male	Urban	54	40-55	0	0	0	0	0	No	No	No	No	Yes	Yes	No	No	No	No	No	No
161			59		1	0	0	0	1
161			64		2	0	0	0	1
162	Female	Urban	35	<40	0	0	0	0	0	No	No	No	No	Yes	Yes	No	No	No	No	No	No
162			40		1	0	0	0	1
162			45		2	0	0	0	1
163	Female	Urban	48	40-55	0	0	0	0	0	No	Yes	Yes	No	No	No	No	Yes	Yes	No	No	No
163			53		1	0	1	1	0
163			58		2	0	1	1	0
164	Male	Urban	43	40-55	0	0	0	0	0	No	No	No	No	Yes	Yes	No	No	No	No	No	No
164			48		1	0	0	0	1
164			53		2	0	0	0	1
165	Male	Urban	42	40-55	0	0	0	0	0	No	No	No	No	No	No	No	Yes	Yes	No	No	No
165			47		1	0	0	1	0
165			52		2	0	0	1	0
166	Male	Urban	38	<40	0	0	0	0	0	No	No	No	No	No	No	No	No	No	No	Yes	Yes
166			43		1	1	0	0	0
166			48		2	1	0	0	0
167	Female	Urban	36	<40	0	0	0	0	0	No	No	No	No	No	No	No	No	No	No	No	No
167			41		1	0	0	0	0
167			46		2	0	0	0	0
168	Female	Urban	42	40-55	0	0	0	0	0	No	No	No	No	Yes	Yes	No	No	No	No	No	No
168			47		1	0	0	0	1
168			52		2	0	0	0	1
169	Male	Urban	65	>55	0	0	0	0	0	No	No	No	No	No	No	No	Yes	Yes	No	No	No
169			70		1	0	0	1	0
169			75		2	0	0	1	0
170	Female	Urban	49	40-55	0	0	0	0	0	No	No	No	No	No	No	No	Yes	Yes	No	No	No
170			54		1	0	0	1	0
170			59		2	0	0	1	0
171	Female	Urban	54	40-55	0	0	0	0	0	No	No	No	No	No	No	No	Yes	Yes	No	No	No
171			59		1	0	0	1	0
171			64		2	0	0	1	0
172	Female	Urban	52	40-55	0	0	0	0	1	No	No	No	Yes	Yes	Yes	No	No	No	No	No	Yes
172			57		1	0	0	0	1
172			62		2	1	0	0	1
173	Female	Urban	38	<40	0	0	0	0	0	No	No	No	No	No	No	No	No	No	No	No	No
173			43		1	0	0	0	0
173			48		2	0	0	0	0
174	Male	Urban	49	40-55	0	0	0	0	0	No	No	No	No	No	No	No	No	No	No	No	No
174			54		1	0	0	0	0
174			59		2	0	0	0	0
175	Female	Urban	47	40-55	0	0	0	1	0	No	No	No	No	No	No	Yes	Yes	Yes	No	No	No
175			52		1	0	0	1	0
175			57		2	0	0	1	0
176	Female	Urban	46	40-55	0	0	0	0	0	No	No	No	No	No	No	No	Yes	Yes	No	No	No
176			51		1	0	0	1	0
176			56		2	0	0	1	0
177	Female	Urban	38	<40	0	0	0	0	0	No	No	No	No	No	No	No	Yes	Yes	No	No	No
177			43		1	0	0	1	0
177			48		2	0	0	1	0
178	Male	Urban	66	>55	0	0	0	1	0	No	No	No	No	No	No	Yes	Yes	Yes	No	No	No
178			71		1	0	0	1	0
178			76		2	0	0	1	0
179	Male	Urban	44	40-55	0	0	0	0	0	No	No	No	No	Yes	Yes	No	No	No	No	No	No
179			49		1	0	0	0	1
179			54		2	0	0	0	1
180	Female	Urban	42	40-55	0	0	0	0	0	No	Yes	Yes	No	No	No	No	Yes	Yes	No	No	No
180			47		1	0	1	1	0
180			52		2	0	1	1	0
181	Male	Urban	59	>55	0	0	0	0	0	No	No	No	No	No	No	No	Yes	Yes	No	No	No
181			64		1	0	0	1	0
181			69		2	0	0	1	0
182	Female	Urban	49	40-55	0	0	0	0	0	No	No	No	No	No	No	No	Yes	Yes	No	No	No
182			54		1	0	0	1	0
182			59		2	0	0	1	0
183	Female	Urban	70	>55	0	0	0	0	0	No	No	No	No	No	No	No	Yes	Yes	No	No	No
183			75		1	0	0	1	0
183			80		2	0	0	1	0
184	Female	Urban	39	<40	0	0	0	0	0	No	No	No	No	Yes	Yes	No	No	No	No	No	No
184			44		1	0	0	0	1
184			49		2	0	0	0	1
185	Male	Urban	44	40-55	0	0	0	0	0	No	No	No	No	No	No	No	Yes	Yes	No	No	No
185			49		1	0	0	1	0
185			54		2	0	0	1	0
186	Female	Urban	33	<40	0	0	0	0	0	No	No	No	No	No	No	No	No	No	No	No	No
186			38		1	0	0	0	0
186			43		2	0	0	0	0
187	Female	Urban	47	40-55	0	0	0	0	0	No	No	No	No	No	No	No	Yes	Yes	No	No	No
187			52		1	0	0	1	0
187			57		2	0	0	1	0
188	Female	Urban	53	40-55	0	0	0	0	0	No	No	No	No	Yes	Yes	No	Yes	Yes	No	No	No
188			58		1	0	0	1	1
188			63		2	0	0	1	1
189	Female	Urban	60	>55	0	0	0	0	0	No	No	No	No	No	No	No	Yes	Yes	No	No	Yes
189			65		1	0	0	1	0
189			70		2	1	0	1	0
190	Female	Urban	24	<40	0	0	0	0	0	No	No	No	No	No	No	No	Yes	Yes	No	No	No
190			29		1	0	0	1	0
190			34		2	0	0	1	0
191	Female	Urban	64	>55	0	0	0	0	0	No	Yes	Yes	No	No	No	No	Yes	Yes	No	No	No
191			69		1	0	1	1	0
191			74		2	0	1	1	0
192	Male	Urban	48	40-55	0	0	0	0	0	No	No	No	No	Yes	Yes	No	No	No	No	No	No
192			53		1	0	0	0	1
192			58		2	0	0	0	1
193	Male	Urban	68	>55	0	0	0	0	0	No	No	No	No	No	Yes	No	Yes	Yes	No	No	No
193			73		1	0	0	1	0
193			78		2	0	0	1	1
194	Female	Urban	40	40-55	0	0	0	0	0	No	No	No	No	No	No	No	Yes	Yes	No	No	No
194			45		1	0	0	1	0
194			50		2	0	0	1	0
195	Male	Urban	56	>55	0	0	0	0	0	No	No	No	No	Yes	Yes	No	No	No	No	No	No
195			61		1	0	0	0	1
195			66		2	0	0	0	1
196	Male	Urban	72	>55	0	0	0	0	0	No	No	No	No	No	No	No	Yes	Yes	No	No	No
196			77		1	0	0	1	0
196			82		2	0	0	1	0
197	Female	Urban	76	>55	0	0	0	0	0	No	No	No	No	Yes	Yes	No	No	Yes	No	No	No
197			81		1	0	0	0	1
197			86		2	0	0	1	1
198	Female	Urban	51	40-55	0	0	0	0	0	No	No	No	No	No	No	No	Yes	Yes	No	No	No
198			56		1	0	0	1	0
198			61		2	0	0	1	0
199	Female	Urban	47	40-55	0	0	0	0	0	No	No	No	No	Yes	Yes	No	Yes	Yes	No	No	No
199			52		1	0	0	1	1
199			57		2	0	0	1	1
200	Female	Urban	33	<40	0	0	0	0	0	No	No	No	No	No	No	No	Yes	Yes	No	No	No
200			38		1	0	0	1	0
200			43		2	0	0	1	0
201	Male	Urban	64	>55	0	0	0	0	0	No	No	No	No	Yes	Yes	No	No	No	No	No	No
201			69		1	0	0	0	1
201			74		2	0	0	0	1
202	Female	Urban	65	>55	0	0	0	0	0	No	No	No	No	No	Yes	No	Yes	Yes	No	No	No
202			70		1	0	0	1	0
202			75		2	0	0	1	1
203	Male	Urban	74	>55	0	0	0	0	0	No	No	No	No	Yes	Yes	No	No	Yes	No	No	No
203			79		1	0	0	0	1
203			84		2	0	0	1	1
